# Supplementary material
Source: PubMed Central journal article supplement (PMC5014013)
Supplement: rsbl20160005supp1.pdf [file rsbl20160005supp1.pdf]

## **Evidence for ship noise impacts on humpback whale foraging behaviour**

**Hannah Blair<sup>1,\*</sup>, Nathan Merchant<sup>2</sup>, Ari Friedlaender<sup>3</sup>, David N. Wiley<sup>4</sup>, & Susan E. Parks<sup>1</sup>**

<sup>1</sup>Syracuse University

<sup>2</sup>Cefas

<sup>3</sup>Oregon State University Marine Mammal Institute

<sup>4</sup>Stellwagen Bank National Marine Sanctuary

\*Correspondence (hannah.blair@stonybrook.edu)

### **Supplementary Materials**

#### ***Expanded Methods***

Due to near continuous shipping noise during daylight hours in the study habitat, analyses were limited to nighttime data including only tag records that contained data collected between one hour after sunset to one hour before sunrise to encompass periods with both high and low shipping noise. Selected records included a minimum of five feeding dives by the tagged whale and the passage of at least one large ship on the acoustic record. Feeding dives were defined as dives deeper than 10 m showing clear behaviors associated with bottom feeding [1].

Subsurface behaviors were visualized and quantified using the software application TrackPlot [2]. TrackPlot utilizes tag sensors (e.g. pressure, 3-axis accelerometers) to create a continuous dead reckoned pseudotrack of the whale's three-dimensional path [2]. This pseudotrack is represented by a ribbon marked by a chevron pattern on the dorsal surface to indicate travel direction and orientation (Figure 1). A side-roll exceeding a 40° deviation from a vertical orientation of the dorsal ridge is signified by the yellow coloration of the ribbon, and can be used to indicate the location of a bottom side-roll (Figure 1) [1–3]. Using TrackPlot seven dive behavior measurements were extracted from bottom side-roll dives: the duration of each

dive (s), the rate of descent and ascent (m/s), the maximum depth (m), the number of bottom side roll events, the time between dives (s), and the surface time immediately following each dive (s) (Figure 1B). Depth profiles were examined in MATLAB R2013a.

The presence of ship noise was detected through the Dtag hydrophone recordings (sampling rate either 64 or 96 kHz, system sensitivity -171 dB re 1  $\mu$ Pa [4] (Figure 2A). The tags included a high pass filter at 400 Hz to minimize the contribution of flow noise to the recording. All recordings were decimated to 16 kHz to standardize sampling rates. Received level (RL) was measured using RavenPro 1.5 [5]. Sound pressure level (SPL) measurements to quantify the absolute RL of ship noise on each tag record were taken for a one-minute period in the 2-3 kHz frequency band during the bottom time periods of each dive analyzed, directly following the end of the whale's descent or as soon afterward as feasible to minimize the interference of acoustic energy from whale vocalizations and sand grating caused by the rolling behaviors. The RL measurements were made to allow us to distinguish between behaviors in response to an absolute RL vs. increased RL in the presence of ship noise, as humpback whales have shown differential response to increased RL from ambient wind generated noise vs. ship noise [6].

All statistical analyses were performed in R version 2.15.3. The dependent variable data were square root transformed to approximate a normal distribution. A series of linear mixed-effects models were applied to the data using the *lme* function in the *nlme* package. The seven metrics described above were the dependent variables tested. Two independent variables and their interaction were included in the models: RL and a binomial factor representing a dive in a ship noise exposure period or in a period of no ship noise (SN). Dives in the SN exposure group occurred during the same time period as each ship passage on the record. Dives in the non-exposure group occurred during a time period of the same duration as a ship passage directly

before and directly after the ship passage, in order to more accurately target alterations in dives occurring because of noise presence and intensity as opposed to other stimuli. A random effect of the individual tag deployment was applied to all models. Best model fit was evaluated using the differences in Akaike's Information Criterion corrected for small sample sizes (AICc) [7]. Akaike weights ( $w_i$ ) for each model were calculated based on model AICc values. Variable importance values were then calculated by summing the Akaike weights of all models in the series including a particular variable (Table S3) [7].

### ***Supplementary Tables***

Table S1. Tag records used in analysis.

| <b>Year</b> | <b>Tag ID</b> | <b>Whale ID</b> | <b>Sex,<br/>Reproductive<br/>Status</b> | <b>Tag<br/>Duration<br/>(hh:mm)</b> | <b>Dates<br/>(mm/dd)</b> | <b>Number of Dives<br/>Analyzed</b> | <b>Number of<br/>Ship Passages</b> |
|-------------|---------------|-----------------|-----------------------------------------|-------------------------------------|--------------------------|-------------------------------------|------------------------------------|
| 2006        | mn06_192a     | Division        | F, Subadult                             | 22:06                               | 07/11 - 07/12            | 28                                  | 2                                  |
| 2006        | mn06_195a     | Fulcrum         | F, Pregnant                             | 10:43                               | 07/14 - 07/15            | 22                                  | 1                                  |
| 2006        | mn06_196a     | Dyad            | F, Lactating                            | 21:47                               | 07/15 - 07/16            | 16                                  | 2                                  |
| 2006        | mn06_200c     | Bilbo           | F, Lactating                            | 06:07                               | 07/19                    | 8                                   | 1                                  |
| 2008        | mn08_182a     | Lavalier        | F, Pregnant                             | 18:31                               | 06/30 - 07/01            | 28                                  | 3                                  |
| 2008        | mn08_184b     | Nile            | F, Pregnant                             | 12:32                               | 07/02 - 07/03            | 33                                  | 3                                  |
| 2008        | mn08_189a     | Falcon          | M, N/A                                  | 17:00                               | 07/07 - 07/08            | 20                                  | 1                                  |
| 2009        | mn09_108a     | Division        | F, Resting                              | 17:31                               | 04/18 - 04/19            | 16                                  | 2                                  |
| 2009        | mn09_201a     | Entropy         | F, Pregnant                             | 15:07                               | 07/20 - 07/21            | 22                                  | 1                                  |
| 2009        | mn09_206b     | Samovar         | F, Resting                              | 18:44                               | 07/25 - 07/26            | 25                                  | 2                                  |

Table S2. Mixed-effect models used to assess change in response variables. Bolded models indicate  $\Delta\text{AICc} < 2$ . SN = Ship noise present or absent and RL = received level of ship noise. k indicates number of free parameters in each model.

| <b>Response</b>        | <b>Model</b>               | <b>k</b> | <b>AICc</b>    | <b><math>\Delta\text{AICc}</math></b> | <b><math>w_i</math></b> |
|------------------------|----------------------------|----------|----------------|---------------------------------------|-------------------------|
| <b>Descent Rate</b>    | <b>RL</b>                  | <b>4</b> | <b>-389.91</b> | <b>0</b>                              | <b>0.59</b>             |
|                        | <b>RL, SN</b>              | <b>5</b> | <b>-388.56</b> | <b>1.35</b>                           | <b>0.30</b>             |
|                        | RLxSN                      | 6        | -386.49        | 3.42                                  | 0.11                    |
|                        | SN                         | 4        | -375.76        | 14.15                                 | 0.00                    |
|                        | Null (random effects only) | 3        | -375.33        | 14.58                                 | 0.00                    |
| <b>Ascent Rate</b>     | <b>RL, SN</b>              | <b>5</b> | <b>-288.14</b> | <b>0</b>                              | <b>0.45</b>             |
|                        | RLxSN                      | 6        | -286.10        | 2.03                                  | 0.16                    |
|                        | RL                         | 4        | -285.98        | 2.16                                  | 0.15                    |
|                        | Null (random effects only) | 3        | -285.94        | 2.20                                  | 0.15                    |
|                        | SN                         | 4        | -284.59        | 3.54                                  | 0.08                    |
| <b>Number of Rolls</b> | <b>RL</b>                  | <b>4</b> | <b>394.84</b>  | <b>0</b>                              | <b>0.41</b>             |
|                        | <b>RL, SN</b>              | <b>5</b> | <b>395.49</b>  | <b>0.65</b>                           | <b>0.30</b>             |
|                        | Null (random effects only) | 3        | 397.11         | 2.27                                  | 0.13                    |
|                        | RLxSN                      | 6        | 397.37         | 2.53                                  | 0.12                    |
|                        | SN                         | 4        | 399.16         | 4.31                                  | 0.05                    |

Table S3. Variable importance for descent rate, ascent rate and number of rolls

| <b>Response</b>        | <b>Variable</b> | <b>Variable Importance</b> |
|------------------------|-----------------|----------------------------|
| <b>Descent Rate</b>    | RL              | 0.89                       |
|                        | SN              | 0.30                       |
|                        | RLxSN           | 0.11                       |
| <b>Ascent Rate</b>     | RL              | 0.61                       |
|                        | SN              | 0.53                       |
|                        | RLxSN           | 0.16                       |
| <b>Number of Rolls</b> | RL              | 0.71                       |
|                        | SN              | 0.34                       |
|                        | RLxSN           | 0.12                       |

## Supplementary Figures

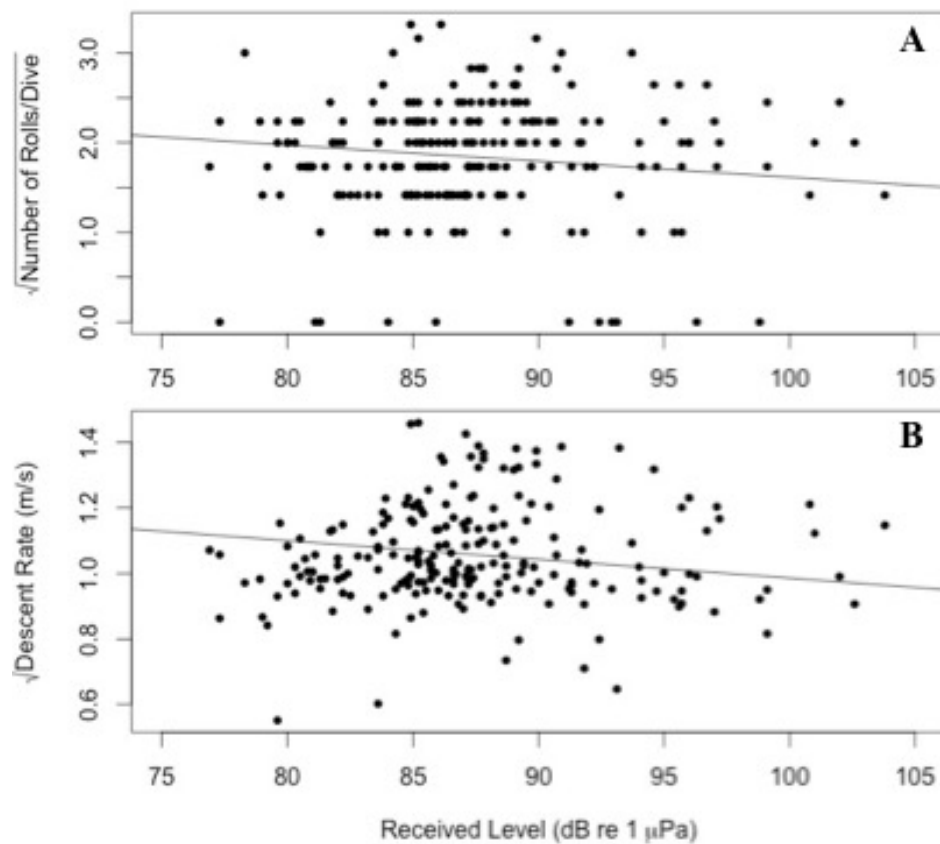

Figure S1. According to the respective best-fit models, as RL increased, A) number of rolls per dive decreased by 29% and B) descent rate decreased by 14.5%.

1. Ware, C. et al. 2014 Bottom side-roll feeding by humpback whales (*Megaptera novaeangliae*) in the southern Gulf of Maine, U.S.A. *Mar. Mammal Sci.* **30**, 494–511. (doi:10.1111/mms.12053)
2. Ware, C., Arsenault, R., Plumlee, M. & Wiley, D. 2006 Visualizing the underwater behavior of humpback whales. *IEEE Comput. Graph. Appl.* **26**, 14–18. (doi:10.1109/MCG.2006.93)
3. Friedlaender, A. S., Hazen, E. L., Nowacek, D. P., Halpin, P. N., Ware, C., Weinrich, M. T., Hurst, T. & Wiley, D. 2009 Diel changes in humpback whale *Megaptera novaeangliae* feeding behavior in response to sand lance *Ammodytes* spp. behavior and distribution. *Mar. Ecol. Prog. Ser.* **395**, 91–100. (doi:10.3354/meps08003)
4. Stimpert, A. K., Au, W. W. L., Parks, S. E., Hurst, T. & Wiley, D. N. 2011 Common humpback whale (*Megaptera novaeangliae*) sound types for passive acoustic monitoring. *J. Acoust. Soc. Am.* **129**, 476–82. (doi:10.1121/1.3504708)

5. Bioacoustics Research Program 2014 RavenPro.
6. Dunlop, R. A. 2016 The effect of vessel noise on humpback whale, *Megaptera novaeangliae*, communication behaviour. *Anim. Behav.* **111**, 13–21. (doi:10.1016/j.anbehav.2015.10.002)
7. Burnham, K. P. & Anderson, D. R. 2002 *Model selection and multimodel inference: a practical information-theoretic approach*. New York: Springer-Verlag.
